# Supplementary material for: Influence of Postharvest Temperatures on Carotenoid Biosynthesis and Phytochemicals in Mature Green Chili (Capsicum annuum L.)
Source: PubMed Central journal article supplement (PMC7139383; doi:10.3390/antiox9030203), 2020-03-01
Supplement: antioxidants-09-00203-s001.pdf [file antioxidants-09-00203-s001.pdf]

## Supplementary Materials

**Table S1.** The sets of primer sequences of *Psy*, *Lcyb*, *CrtZ*, and *Ccs* used for the qRT-PCR of the carotenoid biosynthesis-related genes.

| GenBank/Genes                                       | Forward primer(5'→3') | Reverse primer(5'→3') |
|-----------------------------------------------------|-----------------------|-----------------------|
| X68017.1/ Phytoene synthase; <i>Psy</i>             | TCTCAAACGGGACAGGATTC  | CCACCTTTGTTTTCCACCTC  |
| X86221.1/ Lycopene-β-cyclase; <i>Lcyb</i>           | AGTTATCCGCAGCTGTTTGG  | CCATGCCAATAACGAGGTTC  |
| Y09225.1/ β-carotene hydroxylase; <i>CrtZ</i>       | GCATATGCACGAGTCACACC  | GGGATAAGGCCTTTATGGTT  |
| X76165.1/Capsanthin/capsorubin synthase; <i>Ccs</i> | TCGAAAGCCTTGGCTCAACA  | GAAAGGAACCCGTGCCAGTA  |
| AY486137.1/ Ubiquitin conjugating; <i>Ubi3</i>      | TGTCCATCTGCTCTCTGTTG  | CACCCCAAGCACAATAAGAC  |

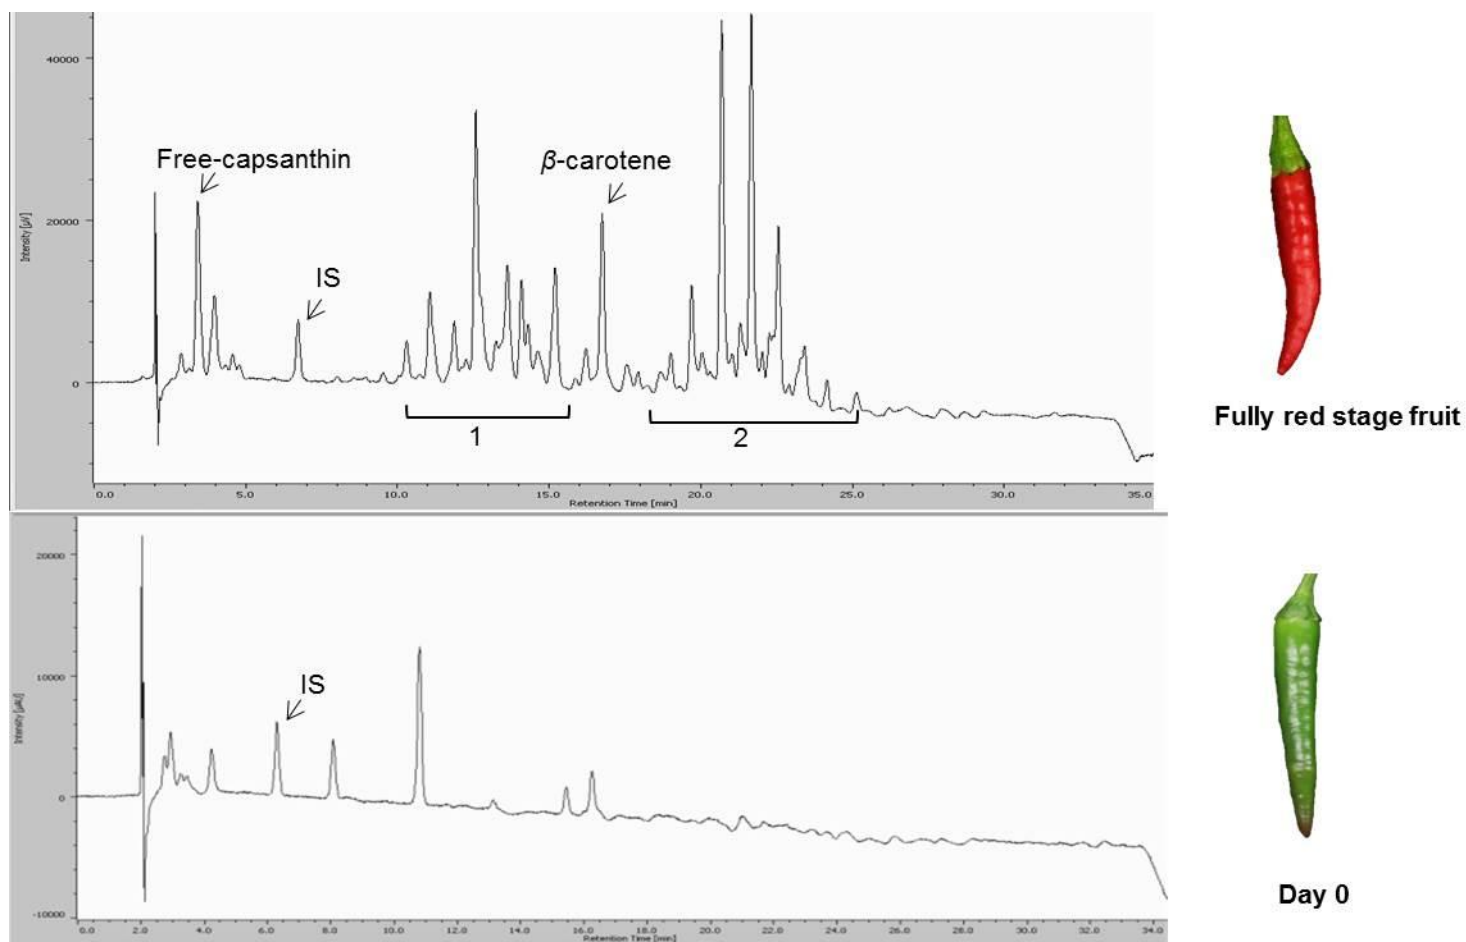

**Figure S1.** Chromatogram of carotenoid profiles in “Takanotsume” chili after harvested at fully red stage fruit and mature green stage. Number 1 and 2 in the chromatogram of fully red fruit were expected to be the mono- and di-esterified carotenoid forms.

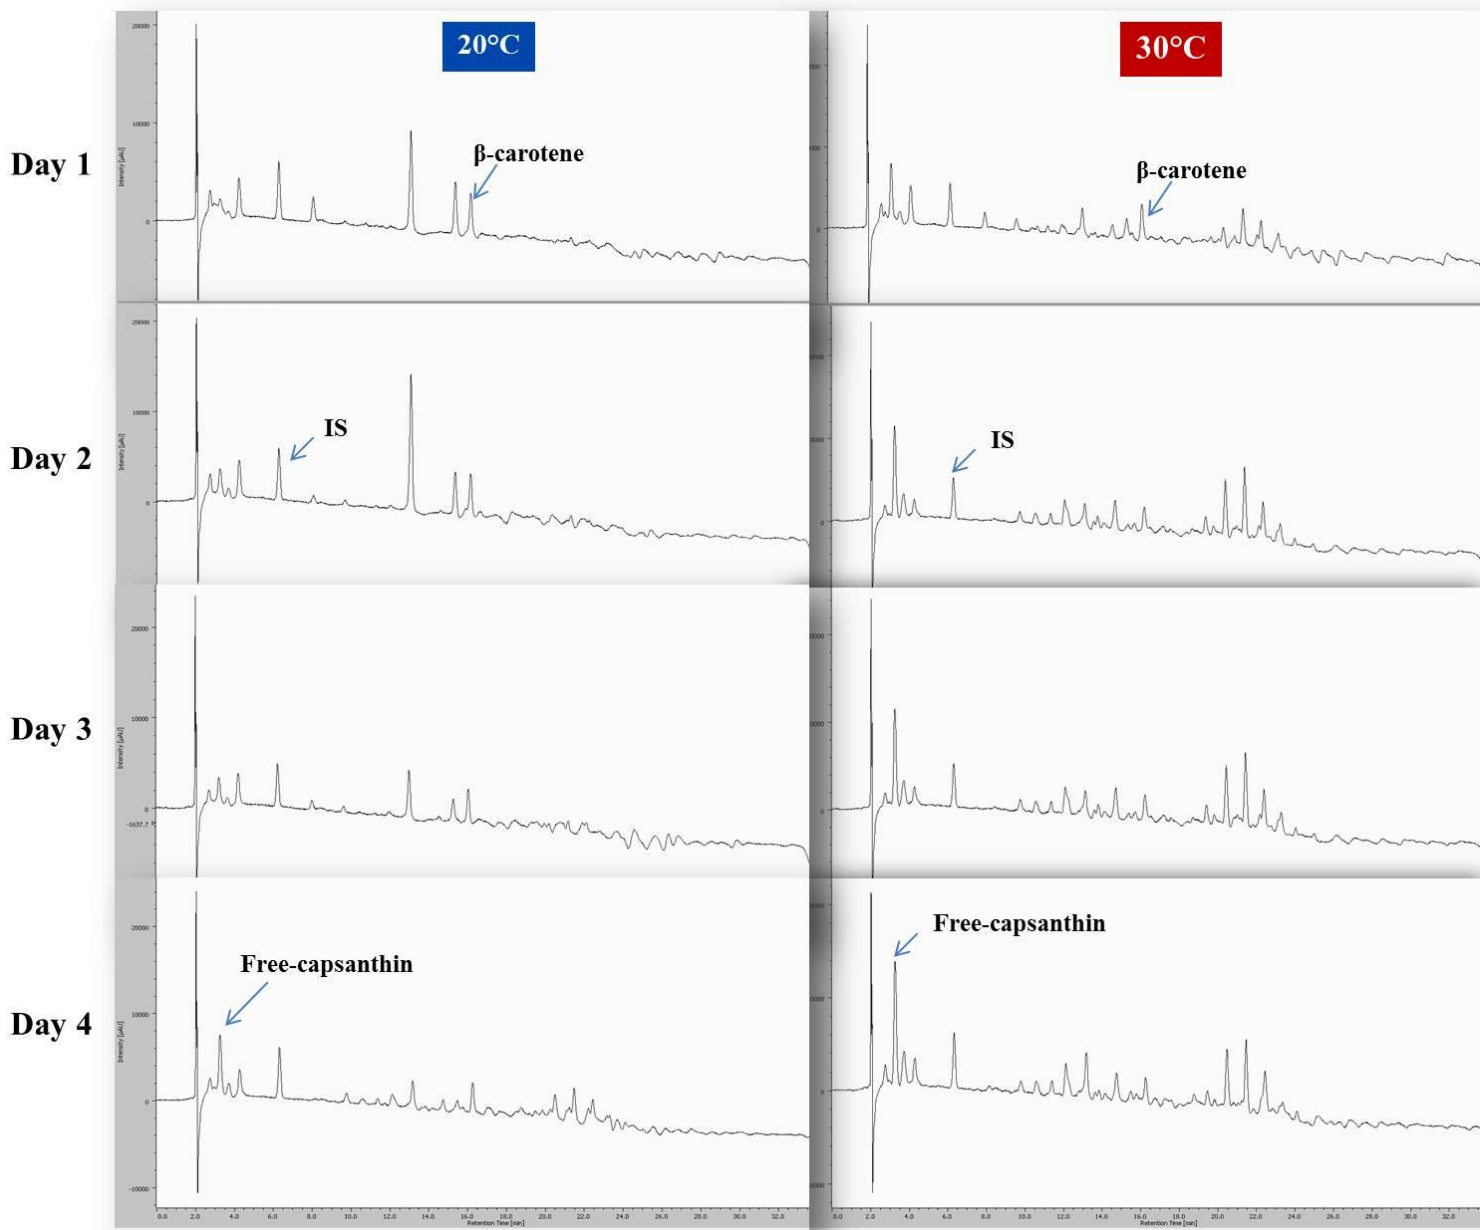

**Figure S2.** Chromatogram of carotenoid profiles in "Takanotsume" chili after incubation at 20 °C and 30 °C for 4 days.
